# Supplementary material for: Investigating the contribution of grown new particles to cloud condensation nuclei with largely varying pre-existing particles – Part 2: Modeling chemical drivers and 3-D NPF occurrence
Source: Copernicus journal article supplement (doi:10.5194/egusphere-2023-540), 2023-08-23
Supplement: Supplementary file [file egusphere-2023-540-RC1-supplement.pdf]

This is a good manuscript that should be published. It is well written and well organized. I have a few suggestions.

Are the times given standard time or daylight time? During summer most countries advance the clock 1 hour. According to the longitudes noted standard time should be 8 hours in advance of GMT for 120 degrees east. This is important for sun time and for anthropogenic influences that are generally a function of local time. In the time plots are the hash marks with date at the beginning of each day (00:00) or are they at the middle of each day (12:00)?

Reveal how many data points are in each of the correlation plots such as Fig. 2b, c and d.

Fig. 3 the abscissa should have equal intervals. E is not designated.

Fig. 5 is not cited in the text.

P1. L36. Delete (cloud condensation nuclei). Already defined it in L31.

P2. L10. Insert these after of.

L11. Delete events.

L21-22. Delete to some extent.

P3. L32. Remove ing. disappear.

P4. L4. Add ing to play.

L14. Delete was prepared for. Change ments to d. change between to from. Change and to to. Change comma to period. Change with to Thus it had.

L20. Delete used for. Change tion to ted. Insert here after evaluated.

P5. L1. J should be the same J as in L2. It is different.

L16. Delete last the.

L17. Delete period from. Change to -. Insert good agreement after not. Change and to or.

L18-19. Define mean fractional bias and mean fractional error.

L20-21. Move US EPA in front of benchmarks. Explain what such a benchmark is and why it is relevant to this research.

L24. Insert not after are. Delete to be.

L25. Change try to tried. Change and to to. Delete poor.

L26. Change The to those. Insert However, before those. Change for to to. Change thereby to therefore.

P6. L4. Delete 1<sup>st</sup> and 2<sup>nd</sup> the.

L25. Delete with the events being most frequently.

L26. Delete observed on. Delete 2<sup>nd</sup> and 3<sup>rd</sup> July. Delete occurrence.

L28. Delete meteorological.

L30. This needs further explanation.

P7. L2. Change as no to because. Insert not after were.

L5. Delete respectively. Nighttime should include two dates.

L6. But there was no data for most of July 5.

L9. Delete The.

L23. Delete the.

L25. Add s to present.

L35. What date?

P8. L13. Delete values.

L26. Explain respectively.

L38. Add s to show.

P9. L20. Insert greater after even.

P10. L11. Change ing to ed.

L29. Probably because of the lack of data on that date.

P11. L21. Delete 1<sup>st</sup> the.

L22. Delete 1<sup>st</sup> the.
